# Supplementary material for: Analysis of the time and workers needed to conduct systematic reviews of medical interventions using data from the PROSPERO registry
Source: PubMed Central journal article supplement — BMJ Open. 2017 Feb 27;7(2):e012545. doi: 10.1136/bmjopen-2016-012545 (PMC5337708; doi:10.1136/bmjopen-2016-012545), 2017-02-27
Supplement: bmjopen-2016-012545supp.pdf [file bmjopen-2016-012545supp.pdf]

PROSPERO references of included reviews [1-195]

1. A Systematic Review of Public Health Emergency Operations Centres: World Health Organization, 2013.
2. Abbott RA, Whear R, Rodgers LR, et al. Effectiveness of mindfulness-based stress reduction and mindfulness based cognitive therapy in vascular disease: A systematic review and meta-analysis of randomised controlled trials. *J Psychosom Res* 2014;76(5):341-51 doi: 10.1016/j.jpsychores.2014.02.012.
3. Abbott RA, Whear R, Thompson-Coon J, et al. Effectiveness of mealtime interventions on nutritional outcomes for the elderly living in residential care: a systematic review and meta-analysis. *Ageing Res Rev* 2013;12(4):967-81 doi: 10.1016/j.arr.2013.06.002.
4. Ashor AW, Lara J, Mathers JC, et al. Effect of vitamin C on endothelial function in health and disease: a systematic review and meta-analysis of randomised controlled trials. *Atherosclerosis* 2014;235(1):9-20 doi: 10.1016/j.atherosclerosis.2014.04.004.
5. Aspinall EJ, Corson S, Doyle JS, et al. Treatment of hepatitis C virus infection among people who are actively injecting drugs: a systematic review and meta-analysis. *Clin Infect Dis* 2013;57 Suppl 2:S80-9 doi: 10.1093/cid/cit306.
6. Aubin JM, Rekman J, Vandenbroucke-Menu F, et al. Systematic review and meta-analysis of liver resection for metastatic melanoma. *Br J Surg* 2013;100(9):1138-47 doi: 10.1002/bjs.9189.
7. Avery L, Flynn D, van Wersch A, et al. Changing physical activity behavior in type 2 diabetes: a systematic review and meta-analysis of behavioral interventions. *Diabetes Care* 2012;35(12):2681-9 doi: 10.2337/dc11-2452.
8. Azad MB, Coneys JG, Kozyrskyj AL, et al. Probiotic supplementation during pregnancy or infancy for the prevention of asthma and wheeze: systematic review and meta-analysis. *BMJ* 2013;347:f6471 doi: 10.1136/bmj.f6471.
9. Bailey RC, Grenyer BF. Burden and support needs of carers of persons with borderline personality disorder: a systematic review. *Harv Rev Psychiatry* 2013;21(5):248-58 doi: 10.1097/HRP.0b013e3182a75c2c.
10. Banerjee D. Association between transportation noise and cardiovascular disease: a meta-analysis of cross-sectional studies among adult populations from 1980 to 2010. *Indian J Public Health* 2014;58(2):84-91 doi: 10.4103/0019-557X.132279.
11. Barry JA, Azizia MM, Hardiman PJ. Risk of endometrial, ovarian and breast cancer in women with polycystic ovary syndrome: a systematic review and meta-analysis. *Hum Reprod Update* 2014;20(5):748-58 doi: 10.1093/humupd/dmu012.
12. Beck CR, McKenzie BC, Hashim AB, et al. Influenza vaccination for immunocompromised patients: systematic review and meta-analysis by etiology. *J Infect Dis* 2012;206(8):1250-9 doi: 10.1093/infdis/jis487.
13. Been JV, Lugtenberg MJ, Smets E, et al. Preterm birth and childhood wheezing disorders: a systematic review and meta-analysis. *PLoS Med* 2014;11(1):e1001596 doi: 10.1371/journal.pmed.1001596.
14. Been JV, Nurmatov UB, Cox B, et al. Effect of smoke-free legislation on perinatal and child health: a systematic review and meta-analysis. *Lancet* 2014;383(9928):1549-60 doi: 10.1016/S0140-6736(14)60082-9.

15. Bueno NB, de Melo IS, de Oliveira SL, et al. Very-low-carbohydrate ketogenic diet v. low-fat diet for long-term weight loss: a meta-analysis of randomised controlled trials. *Br J Nutr* 2013;110(7):1178-87 doi: 10.1017/S0007114513000548.
16. Cancelliere C, Cassidy JD, Li A, et al. Systematic search and review procedures: results of the International Collaboration on Mild Traumatic Brain Injury Prognosis. *Arch Phys Med Rehabil* 2014;95(3 Suppl):S101-31 doi: 10.1016/j.apmr.2013.12.001.
17. Castellucci LA, Cameron C, Le Gal G, et al. *Efficacy and safety outcomes of oral anticoagulants and antiplatelet drugs in the secondary prevention of venous thromboembolism: systematic review and network meta-analysis*, 2013.
18. Castro-Rodriguez JA, Rodrigo GJ. A systematic review of long-acting beta2-agonists versus higher doses of inhaled corticosteroids in asthma. *Pediatrics* 2012;130(3):e650-7 doi: 10.1542/peds.2012-0162.
19. Chambrone L, Foz AM, Guglielmetti MR, et al. Periodontitis and chronic kidney disease: a systematic review of the association of diseases and the effect of periodontal treatment on estimated glomerular filtration rate. *J Clin Periodontol* 2013;40(5):443-56 doi: 10.1111/jcpe.12067.
20. Chambrone L, Pannuti CM, Tu YK, et al. Evidence-based periodontal plastic surgery. II. An individual data meta-analysis for evaluating factors in achieving complete root coverage. *J Periodontol* 2012;83(4):477-90 doi: 10.1902/jop.2011.110382.
21. Chari A, Clemente Morgado T, Rigamonti D. Recommencement of anticoagulation in chronic subdural haematoma: a systematic review and meta-analysis. *Br J Neurosurg* 2014;28(1):2-7 doi: 10.3109/02688697.2013.812184.
22. Cherry MG, Greenhalgh J, Osipenko L, et al. The clinical effectiveness and cost-effectiveness of primary stroke prevention in children with sickle cell disease: a systematic review and economic evaluation. *Health Technol Assess* 2012;16(43):1-129 doi: 10.3310/hta16430.
23. Chester R, Shepstone L, Daniell H, et al. Predicting response to physiotherapy treatment for musculoskeletal shoulder pain: a systematic review. *BMC Musculoskelet Disord* 2013;14:203 doi: 10.1186/1471-2474-14-203.
24. Chua ME, Escusa KG, Luna S, et al. Revisiting oestrogen antagonists (clomiphene or tamoxifen) as medical empiric therapy for idiopathic male infertility: a meta-analysis. *Andrology* 2013;1(5):749-57 doi: 10.1111/j.2047-2927.2013.00107.x.
25. Chung CLR, Côté P, Stern P, et al. The Association Between Cervical Spine Manipulation and Carotid Artery Dissection: A Systematic Review of the Literature. *Journal of Manipulative & Physiological Therapeutics* 2013 doi: 10.1016/j.jmpt.2013.09.005.
26. Clark CE, Horvath IA, Taylor RS, et al. Doctors record higher blood pressures than nurses: systematic review and meta-analysis. *Br J Gen Pract* 2014;64(621):e223-32 doi: 10.3399/bjgp14X677851.
27. Coolbrandt A, Wildiers H, Aertgeerts B, et al. Characteristics and effectiveness of complex nursing interventions aimed at reducing symptom burden in adult patients treated with chemotherapy: a systematic review of randomized controlled trials. *Int J Nurs Stud* 2014;51(3):495-510 doi: 10.1016/j.ijnurstu.2013.08.008.
28. Cox NS, Alison JA, Rasekaba T, et al. Telehealth in cystic fibrosis: a systematic review. *J Telemed Telecare* 2012;18(2):72-8 doi: 10.1258/jtt.2011.110705.

29. Cundy TP, Harling L, Marcus HJ, et al. Meta analysis of robot-assisted versus conventional laparoscopic fundoplication in children. *J Pediatr Surg* 2014;49(4):646-52 doi: 10.1016/j.jpedsurg.2013.12.014.
30. Cundy TP, Marcus HJ, Clark J, et al. Robot-assisted minimally invasive surgery for pediatric solid tumors: a systematic review of feasibility and current status. *Eur J Pediatr Surg* 2014;24(2):127-35 doi: 10.1055/s-0033-1347297.
31. Cunill R, Castells X, Tobias A, et al. Atomoxetine for attention deficit hyperactivity disorder in the adulthood: a meta-analysis and meta-regression. *Pharmacoepidemiology and Drug Safety* 2013;22(9):961-69 doi: 10.1002/pds.3473.
32. Dahm KT, Leiknes KA, Husum TL, et al. Interventions for reducing seclusion and restraint in mental health for adults. *Rapport fra Kunnskapssenteret - Systematisk oversikt* 2012(09).
33. Desveaux L, Beauchamp M, Goldstein R, et al. Community-based exercise programs as a strategy to optimize function in chronic disease: a systematic review. *Med Care* 2014;52(3):216-26 doi: 10.1097/mlr.0000000000000065.
34. Doehring P, Reichow B, Palka T, et al. Behavioral approaches to managing severe problem behaviors in children with autism spectrum and related developmental disorders: a descriptive analysis. *Child Adolesc Psychiatr Clin N Am* 2014;23(1):25-40 doi: 10.1016/j.chc.2013.08.001.
35. Drymoussis P, Raptis DA, Spalding D, et al. Laparoscopic versus open pancreas resection for pancreatic neuroendocrine tumours: a systematic review and meta-analysis. *HPB (Oxford)* 2014;16(5):397-406 doi: 10.1111/hpb.12162.
36. Dulai PS, Gleeson MW, Taylor D, et al. Systematic review: The safety and efficacy of hyperbaric oxygen therapy for inflammatory bowel disease. *Aliment Pharmacol Ther* 2014;39(11):1266-75 doi: 10.1111/apt.12753.
37. Dulai PS, Thompson KD, Blunt HB, et al. Risks of serious infection or lymphoma with anti-tumor necrosis factor therapy for pediatric inflammatory bowel disease: a systematic review. *Clin Gastroenterol Hepatol* 2014;12(9):1443-51; quiz e88-9 doi: 10.1016/j.cgh.2014.01.021.
38. Elazab N, Mendy A, Gasana J, et al. Probiotic administration in early life, atopy, and asthma: a meta-analysis of clinical trials. *Pediatrics* 2013;132(3):e666-76 doi: 10.1542/peds.2013-0246.
39. Emdin CA, Chong NJ, Millson PE. Non-physician clinician provided HIV treatment results in equivalent outcomes as physician-provided care: a meta-analysis. *J Int AIDS Soc* 2013;16:18445 doi: 10.7448/ias.16.1.18445.
40. Figueiredo JB, Nastri CO, Vieira AD, et al. Clomiphene combined with gonadotropins and GnRH antagonist versus conventional controlled ovarian hyperstimulation without clomiphene in women undergoing assisted reproductive techniques: systematic review and meta-analysis. *Arch Gynecol Obstet* 2013;287(4):779-90 doi: 10.1007/s00404-012-2672-0.
41. Fleming PS, Johal A, Pandis N. Self-etch primers and conventional acid-etch technique for orthodontic bonding: a systematic review and meta-analysis. *Am J Orthod Dentofacial Orthop* 2012;142(1):83-94 doi: 10.1016/j.ajodo.2012.02.023.
42. Fleming PS, Johal A, Pandis N. The effectiveness of laceback ligatures during initial orthodontic alignment: a systematic review and meta-analysis. *Eur J Orthod* 2013;35(4):539-46 doi: 10.1093/ejo/cjs033.
43. Ford J, Cummins E, Sharma P, et al. Systematic review of the clinical effectiveness and cost-effectiveness, and economic evaluation, of denosumab for the treatment of bone

metastases from solid tumours. *Health Technol Assess* 2013;17(29):1-386 doi: 10.3310/hta17290.

44. Fretheim A, Odgaard-Jensen J, Brors O, et al. Comparative effectiveness of antihypertensive medication for primary prevention of cardiovascular disease: systematic review and multiple treatments meta-analysis. *BMC Med* 2012;10:33 doi: 10.1186/1741-7015-10-33.

45. Frey AU, Sonksen J, Fode M. Neglected side effects after radical prostatectomy: a systematic review. *J Sex Med* 2014;11(2):374-85 doi: 10.1111/jsm.12403.

46. Gallacher K, Morrison D, Jani B, et al. Uncovering treatment burden as a key concept for stroke care: a systematic review of qualitative research. *PLoS Med* 2013;10(6):e1001473 doi: 10.1371/journal.pmed.1001473.

47. Galvao TF, Silva MT, Marques MC, et al. Hypothermia for Perinatal Brain Hypoxia-Ischemia in Different Resource Settings: A Systematic Review. *Journal of Tropical Pediatrics* 2013;59(6):453-59 doi: 10.1093/tropej/fmt047.

48. Galvao TF, Silva MT, Serruya SJ, et al. Safety of Benzathine Penicillin for Preventing Congenital Syphilis: A Systematic Review. *PLoS ONE* 2013;8(2):e56463 doi: 10.1371/journal.pone.0056463.

49. Galvao TF, Silva MT, Zimmermann IR, et al. Pubertal timing in girls and depression: a systematic review. *J Affect Disord* 2014;155:13-9 doi: 10.1016/j.jad.2013.10.034.

50. Garcia-Berrocoso T, Giralt D, Bustamante A, et al. B-type natriuretic peptides and mortality after stroke: a systematic review and meta-analysis. *Neurology* 2013;81(23):1976-85 doi: 10.1212/01.wnl.0000436937.32410.32.

51. Geldsetzer P, Williams TC, Kirolos A, et al. The recognition of and care seeking behaviour for childhood illness in developing countries: a systematic review. *PLoS One* 2014;9(4):e93427 doi: 10.1371/journal.pone.0093427.

52. Graverholt B, Forsetlund L, Jamtvedt G. Reducing hospital admissions from nursing homes: a systematic review. *BMC Health Serv Res* 2014;14:36 doi: 10.1186/1472-6963-14-36.

53. Gudka S, Afuwape FE, Wong B, et al. Chlamydia screening interventions from community pharmacies: a systematic review. *Sex Health* 2013;10(3):229-39 doi: 10.1071/SH12069.

54. Gupta AA, Yao X, Verma S, et al. Systematic chemotherapy for inoperable, locally advanced, recurrent, or metastatic uterine leiomyosarcoma: a systematic review. *Clin Oncol (R Coll Radiol)* 2013;25(6):346-55 doi: 10.1016/j.clon.2012.11.008.

55. Haeusler GM, Carlesse F, Phillips RS. An updated systematic review and meta-analysis of the predictive value of serum biomarkers in the assessment of fever during neutropenia in children with cancer. *Pediatr Infect Dis J* 2013;32(10):e390-6 doi: 10.1097/INF.0b013e31829ae38d.

56. Hempel S, Newberry SJ, Maher AR, et al. Probiotics for the prevention and treatment of antibiotic-associated diarrhea: a systematic review and meta-analysis. *JAMA* 2012;307(18):1959-69 doi: 10.1001/jama.2012.3507.

57. Henshaw H, Ferguson MA. Efficacy of individual computer-based auditory training for people with hearing loss: a systematic review of the evidence. *PLoS One* 2013;8(5):e62836 doi: 10.1371/journal.pone.0062836.

58. Herbert HK, Lee AC, Chandran A, et al. Care seeking for neonatal illness in low- and middle-income countries: a systematic review. *PLoS Med* 2012;9(3):e1001183 doi: 10.1371/journal.pmed.1001183.

59. Hirschfeld G, von Glischinski M, Blankenburg M, et al. Screening for peripheral neuropathies in children with diabetes: a systematic review. *Pediatrics* 2014;133(5):e1324-30 doi: 10.1542/peds.2013-3645.
60. Hobbs N, Godfrey A, Lara J, et al. Are behavioral interventions effective in increasing physical activity at 12 to 36 months in adults aged 55 to 70 years? A systematic review and meta-analysis. *BMC Med* 2013;11:75 doi: 10.1186/1741-7015-11-75.
61. Hopkins U, Itty AS, Nazario H, et al. The effectiveness of delegation interventions by the registered nurse to the unlicensed assistive personnel and their impact on quality of care, patient satisfaction, and RN staff satisfaction: a systematic review. *2012* 2012;10(15):40 doi: 10.11124/jbisrir-2012-65.
62. Horby P, Nguyen NY, Dunstan SJ, et al. The role of host genetics in susceptibility to influenza: a systematic review. *PLoS One* 2012;7(3):e33180 doi: 10.1371/journal.pone.0033180.
63. Huang TS, Shyu YC, Chen HY, et al. Effect of parenteral selenium supplementation in critically ill patients: a systematic review and meta-analysis. *PLoS One* 2013;8(1):e54431 doi: 10.1371/journal.pone.0054431.
64. Huang TS, Shyu YC, Chen HY, et al. A systematic review and meta-analysis of adjuvant interferon therapy after curative treatment for patients with viral hepatitis-related hepatocellular carcinoma. *Journal of Viral Hepatitis* 2013;20(10):729-43 doi: 10.1111/jvh.12096.
65. Hutton P, Taylor PJ. Cognitive behavioural therapy for psychosis prevention: a systematic review and meta-analysis. *Psychol Med* 2014;44(3):449-68 doi: 10.1017/S0033291713000354.
66. Ijaz S, Verbeek J, Seidler A, et al. Night-shift work and breast cancer--a systematic review and meta-analysis. *Scand J Work Environ Health* 2013;39(5):431-47 doi: 10.5271/sjweh.3371.
67. Jacobs WC, Rubinstein SM, Willems PC, et al. The evidence on surgical interventions for low back disorders, an overview of systematic reviews. *Eur Spine J* 2013;22(9):1936-49 doi: 10.1007/s00586-013-2823-4.
68. Jimenez-Rivera C, Jolin-Dahel KS, Fortinsky KJ, et al. International Incidence and Outcomes of Biliary Atresia. *Journal of Pediatric Gastroenterology and Nutrition* 2013;56(4):344-54 doi: 10.1097/MPG.0b013e318282a913.
69. Kamioka IT, K.; Yamada, Y.; Park, H.; Okuizumi, H.; Honda, T.; Okada, S.; Park, S-J.; Kitayuguchi, J.; Handa, S.; Mutoh, Y. Effectiveness of rehabilitation based on recreational activities: A systematic review. *World J Meta-Anal* 2013;1(1):19 doi: 10.13105/wjma.v1.i1.27.
70. Kasawara KT, do Nascimento SL, Costa ML, et al. Exercise and physical activity in the prevention of pre-eclampsia: systematic review. *Acta Obstet Gynecol Scand* 2012;91(10):1147-57 doi: 10.1111/j.1600-0412.2012.01483.x.
71. Kasenda B, Sauerbrei W, Royston P, et al. Investigation of continuous effect modifiers in a meta-analysis on higher versus lower PEEP in patients requiring mechanical ventilation - protocol of the ICEM study. *Systematic Reviews* 2014;3(1):46 doi: doi:10.1186/2046-4053-3-46.
72. Katsanos K, Spiliopoulos S, Karunanithy N, et al. Bayesian network meta-analysis of nitinol stents, covered stents, drug-eluting stents, and drug-coated balloons in the femoropopliteal artery. *J Vasc Surg* 2014;59(4):1123-33 e8 doi: 10.1016/j.jvs.2014.01.041.
73. Keijsers CJ, van Hensbergen L, Jacobs L, et al. Geriatric pharmacology and pharmacotherapy education for health professionals and students: a systematic review. *Br J Clin Pharmacol* 2012;74(5):762-73 doi: 10.1111/j.1365-2125.2012.04268.x.

74. Khatib R, Joseph P, Briel M, et al. Blockade of the renin-angiotensin-aldosterone system (RAAS) for primary prevention of non-valvular atrial fibrillation: a systematic review and meta-analysis of randomized controlled trials. *Int J Cardiol* 2013;165(1):17-24 doi: 10.1016/j.ijcard.2012.02.009.
75. Koley MS, S.; Medhurst, R. Clinical trials of homoeopathy in osteoarthritis: a systematic review. *OA Alternative Medicine* 2013;1(3):7 doi: 10.13172/205207845--3-1097.
76. Krag M, Perner A, Wetterslev J, et al. Stress ulcer prophylaxis versus placebo or no prophylaxis in critically ill patients. A systematic review of randomised clinical trials with meta-analysis and trial sequential analysis. *Intensive Care Med* 2014;40(1):11-22 doi: 10.1007/s00134-013-3125-3.
77. Kunath F, Keck B, Antes G, et al. Tamoxifen for the management of breast events induced by non-steroidal antiandrogens in patients with prostate cancer: a systematic review. *BMC Med* 2012;10:96 doi: 10.1186/1741-7015-10-96.
78. Kunath F, Keck B, Rucker G, et al. Early versus deferred androgen suppression therapy for patients with lymph node-positive prostate cancer after local therapy with curative intent: a systematic review. *BMC Cancer* 2013;13:131 doi: 10.1186/1471-2407-13-131.
79. Lawrence M, Booth J, Mercer S, et al. A systematic review of the benefits of mindfulness-based interventions following transient ischemic attack and stroke. *Int J Stroke* 2013;8(6):465-74 doi: 10.1111/ijvs.12135.
80. LeBlanc AG, Spence JC, Carson V, et al. Systematic review of sedentary behaviour and health indicators in the early years (aged 0-4 years). *Appl Physiol Nutr Metab* 2012;37(4):753-72 doi: 10.1139/h2012-063.
81. Lee L, Li C, Landry T, et al. A systematic review of economic evaluations of enhanced recovery pathways for colorectal surgery. *Ann Surg* 2014;259(4):670-6 doi: 10.1097/SLA.0b013e318295fef8.
82. Li XX, Han M, Wang YY, et al. Chinese herbal medicine for gout: a systematic review of randomized clinical trials. *Clin Rheumatol* 2013;32(7):943-59 doi: 10.1007/s10067-013-2274-7.
83. Livesey G, Taylor R, Livesey H, et al. Is there a dose-response relation of dietary glycemic load to risk of type 2 diabetes? Meta-analysis of prospective cohort studies. *Am J Clin Nutr* 2013;97(3):584-96 doi: 10.3945/ajcn.112.041467.
84. Loblaw DA, Walker-Dilks C, Winquist E, et al. Systemic therapy in men with metastatic castration-resistant prostate cancer: a systematic review. *Clin Oncol (R Coll Radiol)* 2013;25(7):406-30 doi: 10.1016/j.clon.2013.03.002.
85. Lodi-Junqueira L, de Sousa MR, da Paixao LC, et al. Does intravascular ultrasound provide clinical benefits for percutaneous coronary intervention with bare-metal stent implantation? A meta-analysis of randomized controlled trials. *Syst Rev* 2012;1:42 doi: 10.1186/2046-4053-1-42.
86. Malafarina V, Uriz-Otano F, Gil-Guerrero L, et al. The anorexia of ageing: Physiopathology, prevalence, associated comorbidity and mortality. A systematic review. *Maturitas*;74(4):293-302 doi: 10.1016/j.maturitas.2013.01.016.
87. Malafarina V, Uriz-Otano F, Iniesta R, et al. Effectiveness of nutritional supplementation on muscle mass in treatment of sarcopenia in old age: a systematic review. *J Am Med Dir Assoc* 2013;14(1):10-7 doi: 10.1016/j.jamda.2012.08.001.

88. Marcolino MS, Maia JX, Alkmim MB, et al. Telemedicine application in the care of diabetes patients: systematic review and meta-analysis. *PLoS One* 2013;8(11):e79246 doi: 10.1371/journal.pone.0079246.
89. Mariani J, Doval HC, Nul D, et al. N-3 polyunsaturated fatty acids to prevent atrial fibrillation: updated systematic review and meta-analysis of randomized controlled trials. *J Am Heart Assoc* 2013;2(1):e005033 doi: 10.1161/JAHA.112.005033.
90. Meehan S, Beck CR, Mair-Jenkins J, et al. Maternal obesity and infant mortality: a meta-analysis. *Pediatrics* 2014;133(5):863-71 doi: 10.1542/peds.2013-1480.
91. Mesgarpour B, Griebler U, Glechner A, et al. Extended-release opioids in the management of cancer pain: a systematic review of efficacy and safety. *Eur J Pain* 2014;18(5):605-16 doi: 10.1002/j.1532-2149.2013.00401.x.
92. Mickenautsch S, Yengopal V. Failure rate of high-viscosity GIC based ART compared with that of conventional amalgam restorations--evidence from an update of a systematic review. *SADJ* 2012;67(7):329-31.
93. Mills SDH, Tanner LM, Adams J. Systematic literature review of the effects of food and drink advertising on food and drink-related behaviour, attitudes and beliefs in adult populations. *Obesity Reviews* 2013;14(4):303-14 doi: 10.1111/obr.12012.
94. Moodie LH, Reeve JC, Vermeulen N, et al. Inspiratory muscle training to facilitate weaning from mechanical ventilation: protocol for a systematic review. *BMC Res Notes* 2011;4:283 doi: 10.1186/1756-0500-4-283.
95. Morici N, Moja L, Rosato V, et al. Time from adenosine di-phosphate receptor antagonist discontinuation to coronary bypass surgery in patients with acute coronary syndrome: meta-analysis and meta-regression. *Int J Cardiol* 2013;168(3):1955-64 doi: 10.1016/j.ijcard.2012.12.087.
96. Morona JK, Newton S, Wang S, et al. Genetic testing for hereditary mutations in the VHL gene that cause von Hippel-Lindau syndrom. 2012.
97. Mowatt G, Scotland G, Boachie C, et al. The diagnostic accuracy and cost-effectiveness of magnetic resonance spectroscopy and enhanced magnetic resonance imaging techniques in aiding the localisation of prostate abnormalities for biopsy: a systematic review and economic evaluation. *Health Technol Assess* 2013;17(20):vii-xix, 1-281 doi: 10.3310/hta17200.
98. Munn Z, Jordan Z. The effectiveness of interventions to reduce anxiety, claustrophobia, sedation and non-completion rates of patients undergoing high technology medical imaging. *2012* 2012;10(19):64 doi: 10.11124/jbisrir-2012-59.
99. Murray SF, Hunter BM, Bisht R, et al. Demand-side financing measures to increase maternal health service utilisation and improve health outcomes: a systematic review of evidence from low- and middle-income countries. *2012* 2012;10(58):403 doi: 10.11124/jbisrir-2012-408.
100. Murugesan J, Mor I, Fulham S, et al. Systematic review of efficacy of LIFT procedure in cryptoglandular fistula-in-ano. *Journal of Coloproctology* 2014;34(2):109-19 doi: <http://dx.doi.org/10.1016/j.jcol.2014.02.008>.
101. Muthuri SG, Myles PR, Venkatesan S, et al. Impact of neuraminidase inhibitor treatment on outcomes of public health importance during the 2009-2010 influenza A(H1N1) pandemic: a systematic review and meta-analysis in hospitalized patients. *J Infect Dis* 2013;207(4):553-63 doi: 10.1093/infdis/jis726.

102. Naing C, Racloz V, Whittaker MA, et al. Efficacy and safety of dihydroartemisinin-piperaquine for treatment of *Plasmodium vivax* malaria in endemic countries: meta-analysis of randomized controlled studies. *PLoS One* 2013;8(12):e78819 doi: 10.1371/journal.pone.0078819.
103. Naing C, Whittaker MA, Nyunt-Wai V, et al. Malaria and soil-transmitted intestinal helminth co-infection and its effect on anemia: a meta-analysis. *Trans R Soc Trop Med Hyg* 2013;107(11):672-83 doi: 10.1093/trstmh/trt086.
104. Nascimento LR, Michaelsen SM, Ada L, et al. Cyclical electrical stimulation increases strength and improves activity after stroke: a systematic review. *J Physiother* 2014;60(1):22-30 doi: 10.1016/j.jphys.2013.12.002.
105. Notley C, Blyth A, Maskrey V, et al. The experience of long-term opiate maintenance treatment and reported barriers to recovery: a qualitative systematic review. *Eur Addict Res* 2013;19(6):287-98 doi: 10.1159/000346674.
106. Nurmatov U, Buckingham S, Kendall M, et al. Effectiveness of holistic interventions for people with severe chronic obstructive pulmonary disease: systematic review of controlled clinical trials. *PLoS One* 2012;7(10):e46433 doi: 10.1371/journal.pone.0046433.
107. O'Dwyer T, O'Shea F, Wilson F. Exercise therapy for spondyloarthritis: a systematic review. *Rheumatol Int* 2014;34(7):887-902 doi: 10.1007/s00296-014-2965-7.
108. O'Neill SM, Kearney PM, Kenny LC, et al. Caesarean delivery and subsequent pregnancy interval: a systematic review and meta-analysis. *BMC Pregnancy Childbirth* 2013;13:165 doi: 10.1186/1471-2393-13-165.
109. Oram S, Trevillion K, Khalifeh H, et al. Systematic review and meta-analysis of psychiatric disorder and the perpetration of partner violence. *Epidemiol Psychiatr Sci* 2014;23(4):361-76 doi: 10.1017/S2045796013000450.
110. O'Sullivan K, O'Keeffe M, O'Sullivan L, et al. The effect of dynamic sitting on the prevention and management of low back pain and low back discomfort: a systematic review. *Ergonomics* 2012;55(8):898-908 doi: 10.1080/00140139.2012.676674.
111. Palma AF, Oberkofler CE, Raptis DA, et al. Novel rescue procedure for inferior vena cava reconstruction in living-donor liver transplantation using a vascular graft recovered 25 h after donors' circulatory death and systematic review. *Transpl Int* 2014;27(2):204-10 doi: 10.1111/tri.12238.
112. Pandor A, Thokala P, Gomersall T, et al. Home telemonitoring or structured telephone support programmes after recent discharge in patients with heart failure: systematic review and economic evaluation. *Health Technol Assess* 2013;17(32):1-207, v-vi doi: 10.3310/hta17320.
113. Partridge JS, Harari D, Martin FC, et al. The impact of pre-operative comprehensive geriatric assessment on postoperative outcomes in older patients undergoing scheduled surgery: a systematic review. *Anaesthesia* 2014;69 Suppl 1:8-16 doi: 10.1111/anae.12494.
114. Patel TK, Barvaliya MJ, Sharma D, et al. A systematic review of the drug-induced Stevens-Johnson syndrome and toxic epidermal necrolysis in Indian population. *Indian J Dermatol Venereol Leprol* 2013;79(3):389-98 doi: 10.4103/0378-6323.110749.
115. Pelucchi C, Chatenoud L, Turati F, et al. Probiotics supplementation during pregnancy or infancy for the prevention of atopic dermatitis: a meta-analysis. *Epidemiology* 2012;23(3):402-14 doi: 10.1097/EDE.0b013e31824d5da2.



116. Pelucchi C, Galeone C, Bach JF, et al. Pet exposure and risk of atopic dermatitis at the pediatric age: a meta-analysis of birth cohort studies. *J Allergy Clin Immunol* 2013;132(3):616-22 e7 doi: 10.1016/j.jaci.2013.04.009.
117. Pham A, Liu G. Dexamethasone for Antiemesis in Laparoscopic Gynecologic Surgery: A Systematic Review and Meta-Analysis. *Obstetrics & Gynecology* 2012;120(6):1451-58 doi: <http://10.1097/AOG.0b013e31827590f3>.
118. Pol K, Christensen R, Bartels EM, et al. Whole grain and body weight changes in apparently healthy adults: a systematic review and meta-analysis of randomized controlled studies. *Am J Clin Nutr* 2013;98(4):872-84 doi: 10.3945/ajcn.113.064659.
119. Polanski LT, Barbosa MA, Martins WP, et al. Interventions to improve reproductive outcomes in women with elevated natural killer cells undergoing assisted reproduction techniques: a systematic review of literature. *Hum Reprod* 2014;29(1):65-75 doi: 10.1093/humrep/det414.
120. Polese JC, Ada L, Dean CM, et al. Treadmill training is effective for ambulatory adults with stroke: a systematic review. *J Physiother* 2013;59(2):73-80 doi: 10.1016/S1836-9553(13)70159-0.
121. Reichow B, Servili C, Yasamy MT, et al. Non-specialist psychosocial interventions for children and adolescents with intellectual disability or lower-functioning autism spectrum disorders: a systematic review. *PLoS Med* 2013;10(12):e1001572; discussion e72 doi: 10.1371/journal.pmed.1001572.
122. Riemsma R, Al M, Corro Ramos I, et al. SeHCAT [tauroselcholic (selenium-75) acid] for the investigation of bile acid malabsorption and measurement of bile acid pool loss: a systematic review and cost-effectiveness analysis. *Health Technol Assess* 2013;17(61):1-236 doi: 10.3310/hta17610.
123. Rodrigo GJ, Castro-Rodriguez JA. Daily vs. intermittent inhaled corticosteroids for recurrent wheezing and mild persistent asthma: a systematic review with meta-analysis. *Respir Med* 2013;107(8):1133-40 doi: 10.1016/j.rmed.2013.05.005.
124. Rodrigo GJ, Neffen H. Comparison of indacaterol with tiotropium or twice-daily long-acting beta -agonists for stable COPD: a systematic review. *Chest* 2012;142(5):1104-10 doi: 10.1378/chest.11-2252.
125. Rodriguez L, Ethier MC, Phillips B, et al. Utility of peripheral blood cultures in patients with cancer and suspected blood stream infections: a systematic review. *Support Care Cancer* 2012;20(12):3261-7 doi: 10.1007/s00520-012-1471-2.
126. Ruan SY, Lin HH, Huang CT, et al. Exploring the heterogeneity of effects of corticosteroids on acute respiratory distress syndrome: a systematic review and meta-analysis. *Crit Care* 2014;18(2):R63 doi: 10.1186/cc13819.
127. Araghi MH, Chen YF, Jagielski A, et al. Effectiveness of lifestyle interventions on obstructive sleep apnea (OSA): systematic review and meta-analysis. *SLEEP* 2013;36(10):1553-62 doi: <http://doi.org/10.5665/sleep.3056>.
128. Saha S, Koley M. Homeopathic treatment of headaches & migraine: a meta-analysis of the randomized controlled trials. *Asian Journal of Pharmaceutical and Clinical Research* 2013;6(S3):5.
129. Santomassino M, Costantini GD, McDermott M, et al. A systematic review on the effectiveness of continuity of care and its role in patient satisfaction and decreased hospital

readmissions in the adult patient receiving home care services. *2012* 2012;10(21):46 doi: 10.11124/jbisrir-2012-56.

130. Saunders TJ, Larouche R, Colley RC, et al. Acute sedentary behaviour and markers of cardiometabolic risk: a systematic review of intervention studies. *J Nutr Metab* 2012;2012:712435 doi: 10.1155/2012/712435.

131. Sawh SC, Newman JJ, Deshpande S, et al. Lacosamide adjunctive therapy for partial-onset seizures: a meta-analysis. *PeerJ* 2013;1:e114 doi: 10.7717/peerj.114.

132. Schneeberger AR, Dietl MF, Muenzenmaier KH, et al. Stressful childhood experiences and health outcomes in sexual minority populations: a systematic review. *Soc Psychiatry Psychiatr Epidemiol* 2014;49(9):1427-45 doi: 10.1007/s00127-014-0854-8.

133. Schwingshackl L, Hoffmann G. Comparison of effects of long-term low-fat vs high-fat diets on blood lipid levels in overweight or obese patients: a systematic review and meta-analysis. *J Acad Nutr Diet* 2013;113(12):1640-61 doi: 10.1016/j.jand.2013.07.010.

134. Schwingshackl L, Hoffmann G. Long-term effects of low-fat diets either low or high in protein on cardiovascular and metabolic risk factors: a systematic review and meta-analysis. *Nutr J* 2013;12:48 doi: 10.1186/1475-2891-12-48.

135. Selk A, Kroft J. Misoprostol in operative hysteroscopy: a systematic review and meta-analysis. *Obstet Gynecol* 2011;118(4):941-9 doi: 10.1097/AOG.0b013e31822f3c7b.

136. Shamliyan TA, Kane RL, Ramakrishnan R, et al. Episodic migraines in children: limited evidence on preventive pharmacological treatments. *J Child Neurol* 2013;28(10):1320-41 doi: 10.1177/0883073813488659.

137. Shepherd J, Dewhirst S, Pickett K, et al. Factors facilitating and constraining the delivery of effective teacher training to promote health and well-being in schools: a survey of current practice and systematic review. Factors facilitating and constraining the delivery of effective teacher training to promote health and well-being in schools: a survey of current practice and systematic review. Southampton (UK), 2013.

138. Shepherd J, Jones J, Frampton G, et al. Clinical effectiveness and cost-effectiveness of depth of anaesthesia monitoring (E-Entropy, Bispectral Index and Narcotrend): a systematic review and economic evaluation. *Health Technol Assess* 2013;17(34):1-264 doi: 10.3310/hta17340.

139. Shneerson C, Taskila T, Gale N, et al. The effect of complementary and alternative medicine on the quality of life of cancer survivors: a systematic review and meta-analyses. *Complement Ther Med* 2013;21(4):417-29 doi: 10.1016/j.ctim.2013.05.003.

140. Silva MT, Galvao TF, Zimmerman IR, et al. Non-aspirin non-steroidal anti-inflammatory drugs for the primary chemoprevention of non-gastrointestinal cancer: summary of evidence. *Curr Pharm Des* 2012;18(26):4047-70.

141. Silva MT, Zimmermann IR, Galvao TF, et al. Olanzapine plus fluoxetine for bipolar disorder: a systematic review and meta-analysis. *J Affect Disord* 2013;146(3):310-8 doi: 10.1016/j.jad.2012.11.001.

142. Simpson R, Booth J, Lawrence M, et al. Mindfulness based interventions in multiple sclerosis--a systematic review. *BMC Neurol* 2014;14:15 doi: 10.1186/1471-2377-14-15.

143. Singh B, Parsaik AK, Mielke MM, et al. Association of mediterranean diet with mild cognitive impairment and Alzheimer's disease: a systematic review and meta-analysis. *J Alzheimers Dis* 2014;39(2):271-82 doi: 10.3233/JAD-130830.

144. Singh B, Parsaik AK, Prokop LJ, et al. Endovascular therapy for acute ischemic stroke: a systematic review and meta-analysis. *Mayo Clin Proc* 2013;88(10):1056-65 doi: 10.1016/j.mayocp.2013.07.015.
145. Smith T, Hameed Y, Cross J, et al. Assessment of people with cognitive impairment and hip fracture: A systematic review and meta-analysis. *Archives of Gerontology and Geriatrics* 2013;57(2):117-26 doi: <http://dx.doi.org/10.1016/j.archger.2013.04.009>.
146. Smith TO, Bacon H, Jerman E, et al. Physiotherapy and occupational therapy interventions for people with benign joint hypermobility syndrome: a systematic review of clinical trials. *Disabil Rehabil* 2014;36(10):797-803 doi: 10.3109/09638288.2013.819388.
147. Smith TO, Daniell H, Geere J-A, et al. The diagnostic accuracy of MRI for the detection of partial- and full-thickness rotator cuff tears in adults. *Magnetic Resonance Imaging* 2012;30(3):336-46 doi: <http://dx.doi.org/10.1016/j.mri.2011.12.008>.
148. Smith TO, Davies L, Hing CB. A systematic review to determine the reliability of knee joint position sense assessment measures. *Knee* 2013;20(3):162-9 doi: 10.1016/j.knee.2012.06.010.
149. Smith TO, Drew BT, Toms AP, et al. Accuracy of magnetic resonance imaging, magnetic resonance arthrography and computed tomography for the detection of chondral lesions of the knee. *Knee Surgery, Sports Traumatology, Arthroscopy* 2012;20(12):2367-79 doi: 10.1007/s00167-012-1905-x.
150. Smith TO, Easton V, Bacon H, et al. The relationship between benign joint hypermobility syndrome and psychological distress: a systematic review and meta-analysis. *Rheumatology (Oxford)* 2014;53(1):114-22 doi: 10.1093/rheumatology/ket317.
151. Smith TO, Jerman E, Easton V, et al. Do people with benign joint hypermobility syndrome (BJHS) have reduced joint proprioception? A systematic review and meta-analysis. *Rheumatol Int* 2013;33(11):2709-16 doi: 10.1007/s00296-013-2790-4.
152. Smith TO, King JJ, Hing CB. The effectiveness of proprioceptive-based exercise for osteoarthritis of the knee: a systematic review and meta-analysis. *Rheumatol Int* 2012;32(11):3339-51 doi: 10.1007/s00296-012-2480-7.
153. Smith TO, Postle K, Penny F, et al. Is reconstruction the best management strategy for anterior cruciate ligament rupture? A systematic review and meta-analysis comparing anterior cruciate ligament reconstruction versus non-operative treatment. *Knee* 2014;21(2):462-70 doi: 10.1016/j.knee.2013.10.009.
154. Smith TO, Simpson M, Ejindu V, et al. The diagnostic test accuracy of magnetic resonance imaging, magnetic resonance arthrography and computer tomography in the detection of chondral lesions of the hip. *Eur J Orthop Surg Traumatol* 2013;23(3):335-44 doi: 10.1007/s00590-012-0972-5.
155. Sonuga-Barke EJ, Brandeis D, Cortese S, et al. Nonpharmacological interventions for ADHD: systematic review and meta-analyses of randomized controlled trials of dietary and psychological treatments. *Am J Psychiatry* 2013;170(3):275-89 doi: 10.1176/appi.ajp.2012.12070991.
156. Southerst D, Nordin MC, Cote P, et al. Is exercise effective for the management of neck pain and associated disorders or whiplash-associated disorders? A systematic review by the Ontario Protocol for Traffic Injury Management (OPTIMA) Collaboration. *Spine J* 2014 doi: 10.1016/j.spinee.2014.02.014.

157. Steffens D, Hancock MJ, Maher CG, et al. Does magnetic resonance imaging predict future low back pain? A systematic review. *Eur J Pain* 2014;18(6):755-65 doi: 10.1002/j.1532-2149.2013.00427.x.
158. Stradling C, Chen YF, Russell T, et al. The effects of dietary intervention on HIV dyslipidaemia: a systematic review and meta-analysis. *PLoS One* 2012;7(6):e38121 doi: 10.1371/journal.pone.0038121.
159. Suchdev PS, Peña-Rosas JP, De-Regil LM. Multiple micronutrient powders for home (point-of-use) fortification of foods in pregnant women. *Cochrane Database of Systematic Reviews* 2014(6) doi: 10.1002/14651858.
160. Sukhodolsky DG, Bloch MH, Panza KE, et al. Cognitive-behavioral therapy for anxiety in children with high-functioning autism: a meta-analysis. *Pediatrics* 2013;132(5):e1341-50 doi: 10.1542/peds.2013-1193.
161. Sunguya BF, Poudel KC, Mlunde LB, et al. Nutrition training improves health workers' nutrition knowledge and competence to manage child undernutrition: a systematic review. *Front Public Health* 2013;1:37 doi: 10.3389/fpubh.2013.00037.
162. Suthar AB, Lawn SD, del Amo J, et al. Antiretroviral therapy for prevention of tuberculosis in adults with HIV: a systematic review and meta-analysis. *PLoS Med* 2012;9(7):e1001270 doi: 10.1371/journal.pmed.1001270.
163. Tanner LM, Moffatt S, Milne EM, et al. Socioeconomic and behavioural risk factors for adverse winter health and social outcomes in economically developed countries: a systematic review of quantitative observational studies. *J Epidemiol Community Health* 2013;67(12):1061-7 doi: 10.1136/jech-2013-202693.
164. Tarp S, Bartels EM, Bliddal H, et al. Effect of nonsteroidal antiinflammatory drugs on the C-reactive protein level in rheumatoid arthritis: a meta-analysis of randomized controlled trials. *Arthritis Rheum* 2012;64(11):3511-21 doi: 10.1002/art.34644.
165. Tatla SK, Sauve K, Virji-Babul N, et al. Evidence for outcomes of motivational rehabilitation interventions for children and adolescents with cerebral palsy: an American Academy for Cerebral Palsy and Developmental Medicine systematic review. *Dev Med Child Neurol* 2013;55(7):593-601 doi: 10.1111/dmcn.12147.
166. Tefikow S, Barth J, Maichrowitz S, et al. Efficacy of hypnosis in adults undergoing surgery or medical procedures: a meta-analysis of randomized controlled trials. *Clin Psychol Rev* 2013;33(5):623-36 doi: 10.1016/j.cpr.2013.03.005.
167. ten Broek RP, Issa Y, van Santbrink EJ, et al. Burden of adhesions in abdominal and pelvic surgery: systematic review and met-analysis. *BMJ* 2013;347:f5588 doi: 10.1136/bmj.f5588.
168. ten Broek RP, Stommel MW, Strik C, et al. Benefits and harms of adhesion barriers for abdominal surgery: a systematic review and meta-analysis. *Lancet* 2014;383(9911):48-59 doi: 10.1016/S0140-6736(13)61687-6.
169. Teunis T, Nota SP, Hornicek FJ, et al. Outcome after reconstruction of the proximal humerus for tumor resection: a systematic review. *Clin Orthop Relat Res* 2014;472(7):2245-53 doi: 10.1007/s11999-014-3474-4.
170. Thiele M, Gluud LL, Dahl EK, et al. Antiviral therapy for prevention of hepatocellular carcinoma and mortality in chronic hepatitis B: systematic review and meta-analysis. *BMJ Open* 2013;3(8) doi: 10.1136/bmjopen-2013-003265.

171. Thombs BD, Roseman M, Coyne JC, et al. Does evidence support the American Heart Association's recommendation to screen patients for depression in cardiovascular care? An updated systematic review. *PLoS One* 2013;8(1):e52654 doi: 10.1371/journal.pone.0052654.
172. Timmons BW, Leblanc AG, Carson V, et al. Systematic review of physical activity and health in the early years (aged 0-4 years). *Appl Physiol Nutr Metab* 2012;37(4):773-92 doi: 10.1139/h2012-070.
173. Tirlapur SA, Vlismas A, Ball E, et al. Nerve stimulation for chronic pelvic pain and bladder pain syndrome: a systematic review. *Acta Obstetrica et Gynecologica Scandinavica* 2013;92(8):881-87 doi: 10.1111/aogs.12184.
174. Tohira H, Williams TA, Jacobs I, et al. The impact of new prehospital practitioners on ambulance transportation to the emergency department: a systematic review and meta-analysis. *Emerg Med J* 2014;31(e1):e88-94 doi: 10.1136/emmermed-2013-202976.
175. Trevillion K, Oram S, Feder G, et al. Experiences of domestic violence and mental disorders: a systematic review and meta-analysis. *PLoS One* 2012;7(12):e51740 doi: 10.1371/journal.pone.0051740.
176. Tricco AC, Chit A, Soobiah C, et al. Comparing influenza vaccine efficacy against mismatched and matched strains: a systematic review and meta-analysis. *BMC Med* 2013;11:153 doi: 10.1186/1741-7015-11-153.
177. Uthman OA, van der Windt DA, Jordan JL, et al. *Exercise for lower limb osteoarthritis: systematic review incorporating trial sequential analysis and network meta-analysis*, 2013.
178. van Middendorp JJ, Hosman AJ, Doi SA. The effects of the timing of spinal surgery after traumatic spinal cord injury: a systematic review and meta-analysis. *J Neurotrauma* 2013;30(21):1781-94 doi: 10.1089/neu.2013.2932.
179. Varatharajan S, Cote P, Shearer HM, et al. Are work disability prevention interventions effective for the management of neck pain or upper extremity disorders? A systematic review by the Ontario Protocol for Traffic Injury Management (OPTIMA) collaboration. *J Occup Rehabil* 2014;24(4):692-708 doi: 10.1007/s10926-014-9501-1.
180. Ventham NT, Hughes M, O'Neill S, et al. Systematic review and meta-analysis of continuous local anaesthetic wound infiltration versus epidural analgesia for postoperative pain following abdominal surgery. *Br J Surg* 2013;100(10):1280-9.
181. Ventham NT, O'Neill S, Johns N, et al. Evaluation of novel local anesthetic wound infiltration techniques for postoperative pain following colorectal resection surgery: a meta-analysis. *Dis Colon Rectum* 2014;57(2):237-50 doi: 10.1097/DCR.000000000000006.
182. Viljoen E, Visser J, Koen N, et al. A systematic review and meta-analysis of the effect and safety of ginger in the treatment of pregnancy-associated nausea and vomiting. *Nutr J* 2014;13:20 doi: 10.1186/1475-2891-13-20.
183. Vonthein R, Heimerl T, Schwandner T, et al. Electrical stimulation and biofeedback for the treatment of fecal incontinence: a systematic review. *Int J Colorectal Dis* 2013;28(11):1567-77 doi: 10.1007/s00384-013-1739-0.
184. Wade R, Spackman E, Corbett M, et al. Adjunctive colposcopy technologies for examination of the uterine cervix--DySIS, LuViva Advanced Cervical Scan and Niris Imaging System: a systematic review and economic evaluation. *Health Technol Assess* 2013;17(8):1-240, v-vi doi: 10.3310/hta17080.

185. Wang XQ, Zheng JJ, Yu ZW, et al. A meta-analysis of core stability exercise versus general exercise for chronic low back pain. *PLoS One* 2012;7(12):e52082 doi: 10.1371/journal.pone.0052082.
186. Whitelock G, Aromataris E. Effectiveness of mealtime interventions to improve nutritional intake of adult patients in the acute care setting: a systematic review. *2013* 2013;11(3):43 doi: 10.11124/jbisrir-2013-458.
187. Wigham S, McConachie H. Systematic review of the properties of tools used to measure outcomes in anxiety intervention studies for children with autism spectrum disorders. *PLoS One* 2014;9(1):e85268 doi: 10.1371/journal.pone.0085268.
188. Wilcken N, Zdenkowski N, White M, et al. Systemic treatment of HER2-positive metastatic breast cancer: a systematic review. *Asia Pac J Clin Oncol* 2014;10 Suppl S4:1-14 doi: 10.1111/ajco.12206.
189. Wong JJ, Cote P, Quesnele JJ, et al. The course and prognostic factors of symptomatic cervical disc herniation with radiculopathy: a systematic review of the literature. *Spine J* 2014;14(8):1781-9 doi: 10.1016/j.spinee.2014.02.032.
190. Wu MY, Hsu YH, Bai CH, et al. Regional citrate versus heparin anticoagulation for continuous renal replacement therapy: a meta-analysis of randomized controlled trials. *Am J Kidney Dis* 2012;59(6):810-8 doi: 10.1053/j.ajkd.2011.11.030.
191. Wu MZ, McInnes MD, Macdonald DB, et al. CT in adults: systematic review and meta-analysis of interpretation discrepancy rates. *Radiology* 2014;270(3):717-35 doi: 10.1148/radiol.13131114.
192. Yang G, Wang Y, Tian J, et al. Huperzine A for Alzheimer's disease: a systematic review and meta-analysis of randomized clinical trials. *PLoS One* 2013;8(9):e74916 doi: 10.1371/journal.pone.0074916.
193. Yu H, Cote P, Southerst D, et al. Does structured patient education improve the recovery and clinical outcomes of patients with neck pain? A systematic review from the Ontario Protocol for Traffic Injury Management (OPTIMa) Collaboration. *Spine J* 2014 doi: 10.1016/j.spinee.2014.03.039.
194. Zarychanski R, Abou-Setta AM, Turgeon AF, et al. Association of hydroxyethyl starch administration with mortality and acute kidney injury in critically ill patients requiring volume resuscitation: a systematic review and meta-analysis. *JAMA* 2013;309(7):678-88 doi: 10.1001/jama.2013.430.
195. Zhang X, Liang F, Yin X, et al. Tofacitinib for acute rheumatoid arthritis patients who have had an inadequate response to disease-modifying antirheumatic drug (DMARD): a systematic review and meta-analysis. *Clin Rheumatol* 2014;33(2):165-73 doi: 10.1007/s10067-013-2452-7.
